# Supplementary material for: Simultaneous profiling of host expression and microbial abundance by spatial metatranscriptome sequencing
Source: HighWire-hosted journal article supplement (doi:10.1101/gr.277178.122), 2023-03-01
Supplement: Supplemental_Material.pdf [file Supplemental_Material.pdf]

Table of contents

Supplemental figures ..... 2

    Figure S1..... 2

    Figure S2..... 4

    Figure S3..... 6

    Figure S4..... 7

Supplemental table..... 8

    Table S1 ..... 8

# Supplemental Figures

Figure S1

Fig. S1

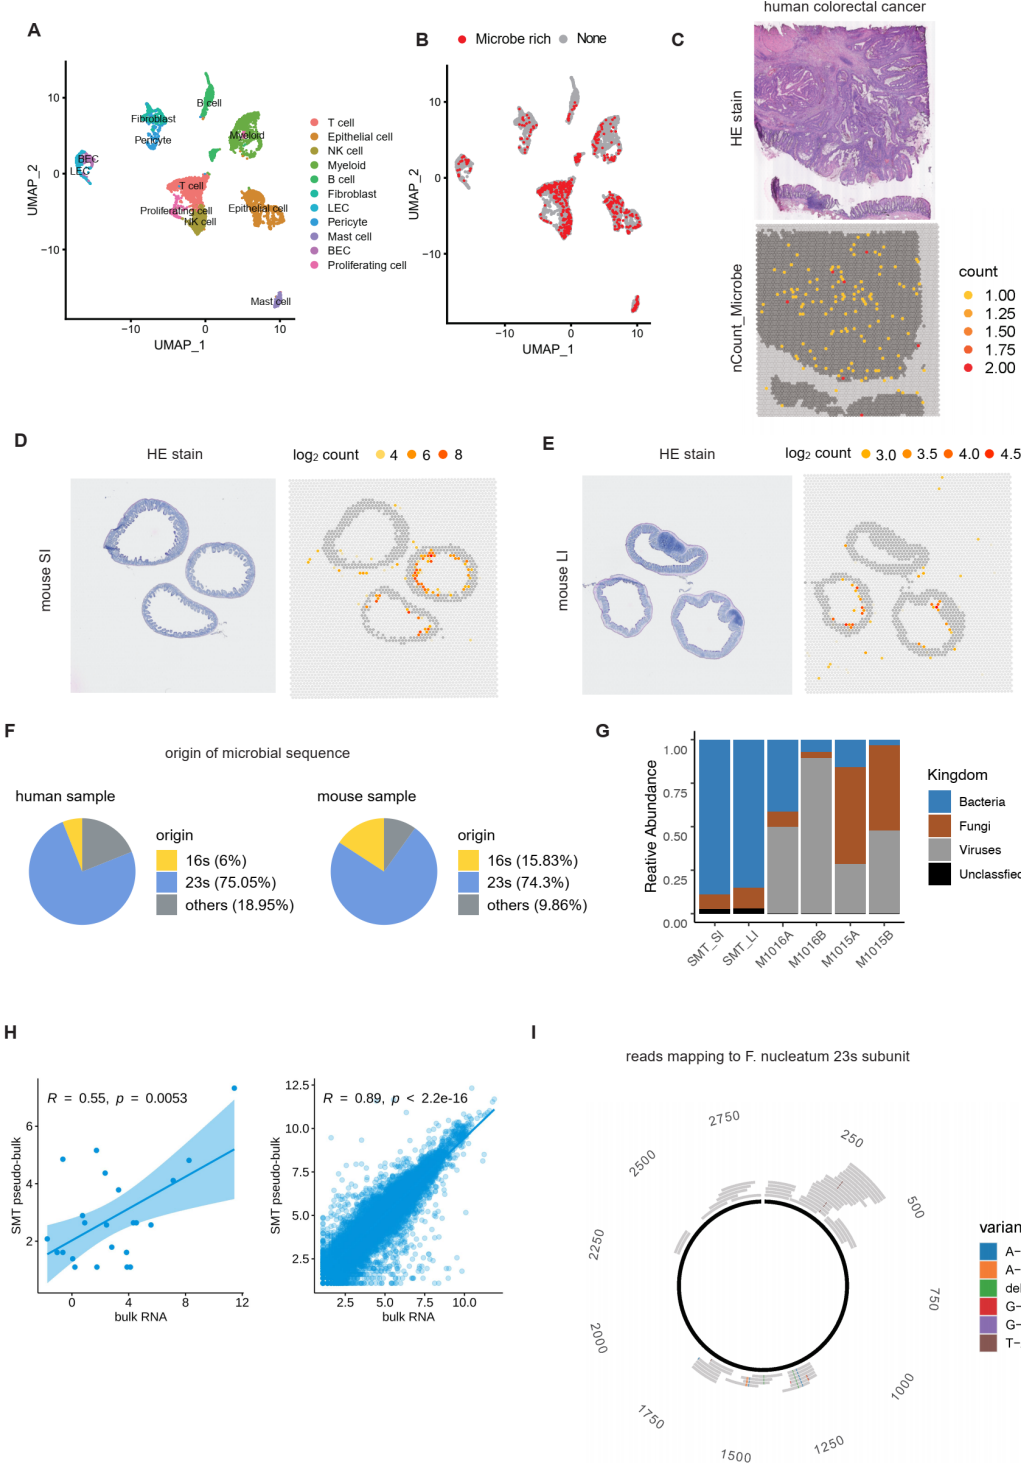

**Fig. S1. Related to Fig 1. (A)** TSNE plot showing single cell sequencing of an unsorted CRC sample, clustered into 11 major cell types. **(B)** Cells in (A) were highlighted in red if they were enriched in microbial sequences ( $>0.02\%$ ). **(C)** H&E stain (top) and microbial UMI count (bottom) for patient M1015. **(D-E)** H&E staining of the tissue section (left) and corresponding log scaled microbial sequence count per spot captured by SMT (right) for mouse small intestine (D) and large intestine (E). Note that 3 samples were placed in each window. **(F)** Pie chart showing origin of microbial sequence captured, for human samples (left) and murine samples (right). **(G)** Microbial composition cross human and murine samples at kingdom level. **(H)** correlation between SMT generated pseudo-bulk measurements (x-axis) and bulk RNA-seq measurements (y-axis), for microbial abundance at genus level (left) and host gene expression (right). Spearman's correlation coefficients and  $p$ -values were shown. **(I)** Representative read alignment to the *Fusobacterium* 23S gene, for M1016A.

Figure S2

Fig. S2

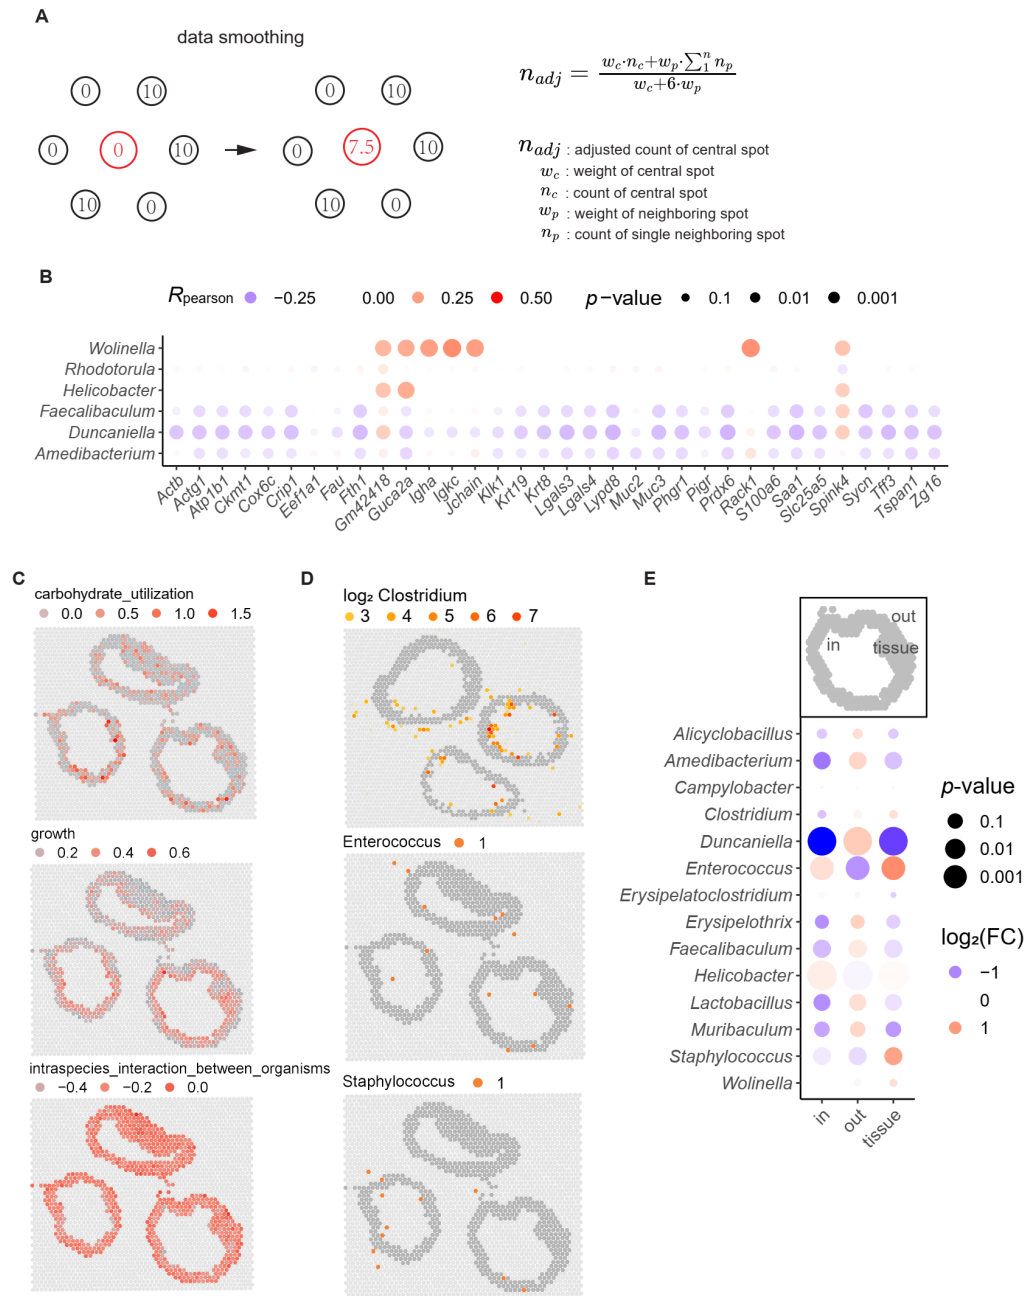

**Fig. S2. Related to Fig 2. (A)** Schema of kernel smoothing performed before microbe-host gene interaction detection. **(B)** Representative dot plot showing the spatial correlation between microbe and host genes in mouse large intestine,  $p$ -values shown were before multi-test correction. **(C)** Representative spatial feature plot showing host pathways that did

not show inter sample difference, in mouse large intestine. **(D)** Spatial feature plot for *Clostridium* in the small intestine, *Enterococcus* and *Staphylococcus* in the large intestine, showing their elevated concentration on tissue and further out, suggesting their trans-intestinal wall mobility. **(E)** Dot plot showing fold change and  $p$ -value for microbial genera that were differentially distributed in the three regions designated 'in' , 'tissue' and 'out' , by Chi-square test, for mouse large intestine.

Figure S3

Fig. S3

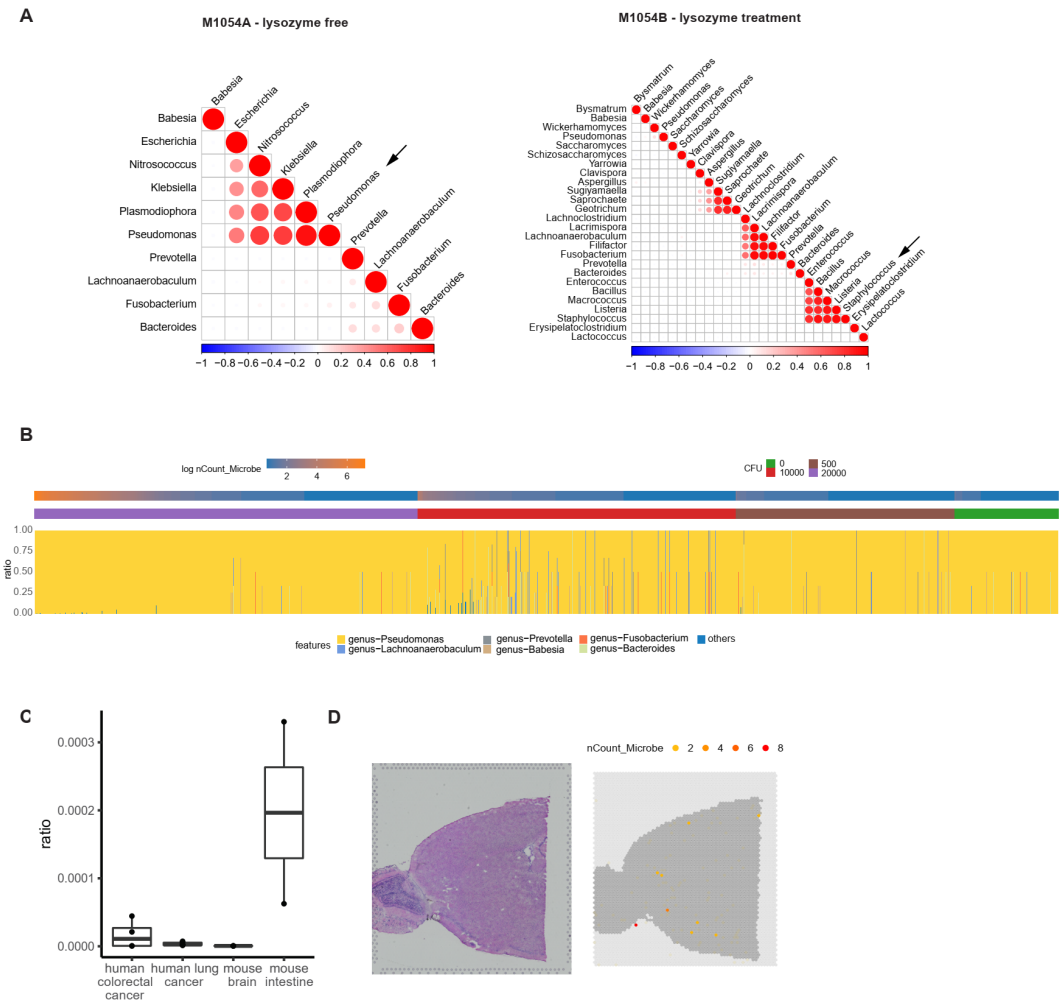

**Fig. S3. Related to Fig 3. (A)** Spatial correlation among bacteria genera as called by SMT, some spillover of the highly abundant control bacteria, *Pseudomonas* and *Staphylococcus*, did occur, manifesting as sequences assigned to closely related taxa. **(B)** Representative stacked bar plot showing microbial composition for individual spot in M1054A, their overall microbial sequence count and amount of control applied were also shown. **(C)** Box plot showing ratio of microbial reads in samples from human colorectal cancer and mouse intestine in this study, as well as a dataset of mouse brain obtained from in 10× Genomics' official website, and a human lung cancer dataset downloaded from SRA. **(D)** Representative spatial feature plot showing distribution of microbe sequence from mouse brain.

Figure S4

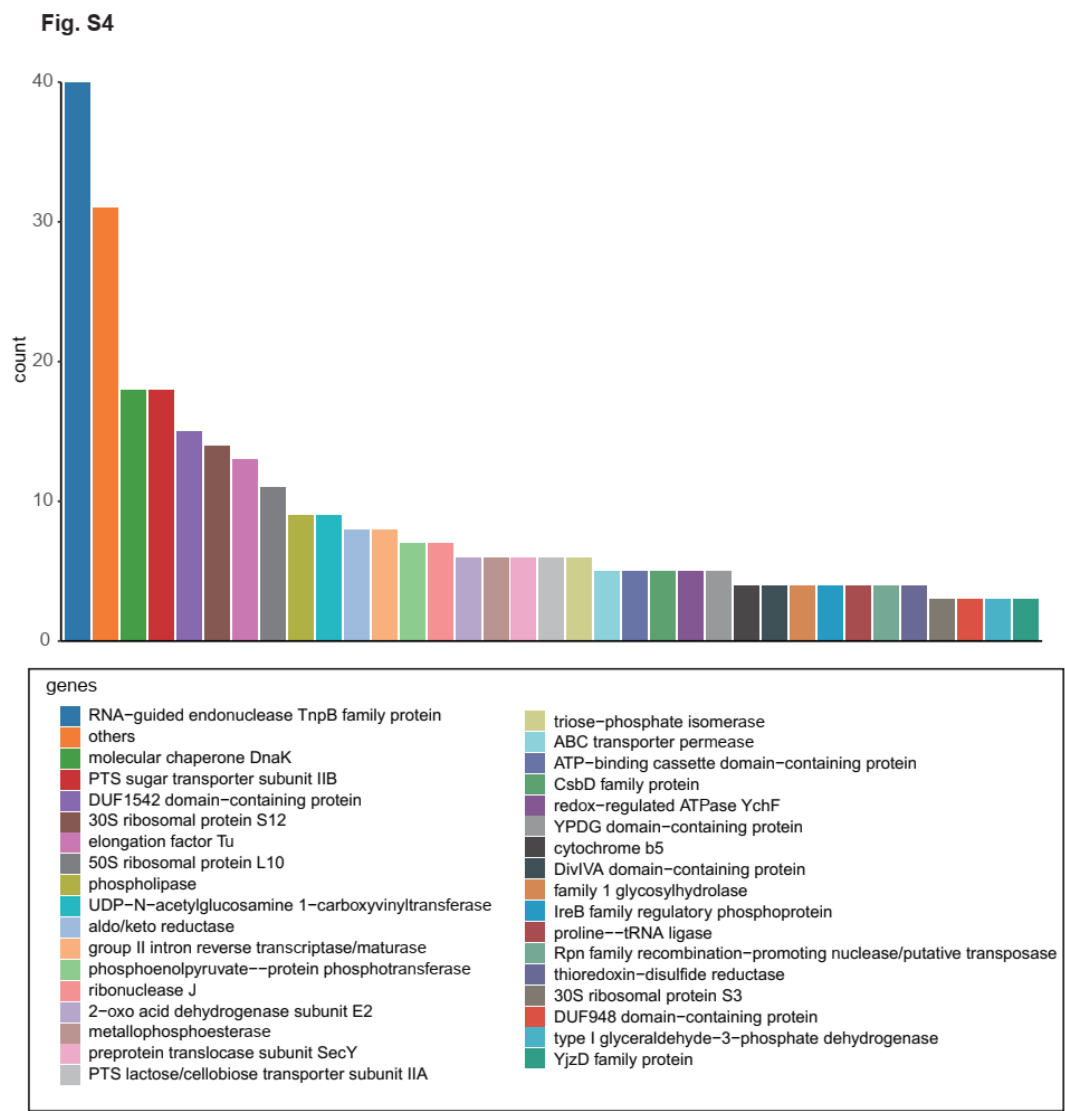

**Fig. S4. The genic annotation for a bacteria recovered by SMT.** For *Lactobacillus*, the most abundant genus in mouse small intestine, a total of 304 mRNA UMI were recovered and their annotations shown.

# Supplemental Table

Table S1

| SMT & kraken2 comparison            |         |       |
|-------------------------------------|---------|-------|
|                                     | Kraken2 | SMT   |
| Microbial reads called <sup>a</sup> | 63493   | 38977 |
| Microbial UMI called                | 8593    | 1453  |
| Read/UMI <sup>b</sup>               | 7.3     | 26.8  |

a. Kraken2 and SMT used same dataset, and the total number of input read is 3233863.

b. Used as a measure of quality, overall read/UMI is  $717337698/27998444 = 25.6$ .
